# Supplementary material for: High activity and specificity of bacteriophage cocktails against carbapenem-resistant Klebsiella pneumoniae belonging to the high-risk clones CG258 and ST307
Source: PubMed Central journal article supplement (PMC11663894; doi:10.3389/fmicb.2024.1502593), 2024-12-09
Supplement: Data_Sheet_1.pdf [file Data_Sheet_1.pdf]

## *Supplementary Material*

**Supplementary Table S1.** Characteristics of *K. pneumoniae* host isolates used for the search and isolation of bacteriophages.

| Host bacteria                         | ID   | Source                   | Carbapenemase                | Clonal<br>group (CG) | Sequence<br>type (ST) | Other antibiotics resistance |                  |               |             |
|---------------------------------------|------|--------------------------|------------------------------|----------------------|-----------------------|------------------------------|------------------|---------------|-------------|
|                                       |      |                          |                              |                      |                       | Aminoglycosides              | Fluoroquinolones | Glycylcycline | Nitrofurans |
| <i>Klebsiella pneumoniae</i><br>(n=3) | KL15 | Hospitalized<br>patients | <i>bla</i> <sub>-KPC-3</sub> | 258                  | 512                   | Resistant                    | Resistant        | Resistant     | ND          |
|                                       | KL56 |                          | <i>bla</i> <sub>-KPC-2</sub> | 258                  | 258                   | Resistant                    | Resistant        | Resistant     | ND          |
|                                       | KH18 |                          | <i>bla</i> <sub>-KPC-2</sub> | 307                  | 307                   | Resistant                    | Resistant        | ND            | Resistant   |

ND, No data. All bacterial isolates are part of the strain collection of the Grupo de Investigación en Microbiología Básica y Aplicada (MICROBA) and were collected in the city of Medellin, Colombia. Identification and susceptibility tests were performed using the semi-automated method VITEK® 2, genes that encoded carbapenemases were identified by PCR and sequenced to determine gene-variants. Finally, molecular typing was performed using Multilocus sequence typing (MLST).
