# Supplementary material for: High activity and specificity of bacteriophage cocktails against carbapenem-resistant Klebsiella pneumoniae belonging to the high-risk clones CG258 and ST307
Source: PubMed Central journal article supplement (PMC11663894; doi:10.3389/fmicb.2024.1502593), 2024-12-09
Supplement: Data_Sheet_2.pdf [file Data_Sheet_2.pdf]

## *Supplementary Material*

**Supplementary Table S2.** Bacterial isolates used for the evaluation of the intra-species host range of bacteriophages active against *K. pneumoniae*.

| Bacteria                     | Characteristic                            | Clonal group (CG) or<br>Clonal complex (CC) | Sequence type (ST)                                                                                                                                                                                     | Number of isolates<br>(n=100) |
|------------------------------|-------------------------------------------|---------------------------------------------|--------------------------------------------------------------------------------------------------------------------------------------------------------------------------------------------------------|-------------------------------|
| <i>Klebsiella pneumoniae</i> | Carbapenems resistant,<br><i>bla-KPC+</i> | CG258                                       | ST512 (n = 4)                                                                                                                                                                                          | 25                            |
|                              |                                           |                                             | ST258 (n = 20)                                                                                                                                                                                         |                               |
|                              |                                           |                                             | ST11 (n = 1)                                                                                                                                                                                           |                               |
|                              |                                           | CC307                                       | ST307                                                                                                                                                                                                  | 15                            |
|                              |                                           | CC14                                        | ST14                                                                                                                                                                                                   | 10                            |
|                              |                                           | Other                                       | ST17, ST23, ST40, ST45, ST129,<br>ST140, ST151, ST231, ST259,<br>ST268, ST444, ST526, ST560,<br>ST971, ST1198, ST1377,<br>ST1533, ST1661, ST1703,<br>ST1704, ST1705, ST1706,<br>ST1707, ST1708, ST1887 | 25                            |
|                              | Carbapenems<br>susceptible                | ND                                          | ND                                                                                                                                                                                                     | 25                            |

ND, No data. All bacterial isolates are part of the strain collection of the Grupo de Investigación en Microbiología Básica y Aplicada (MICROBA) and were collected in the city of Medellin, Colombia. Identification and susceptibility tests were performed using the semi-automated method VITEK® 2, genes that encoded carbapenemases were identified by PCR and molecular typing was performed using Multilocus sequence typing (MLST).
