# Supplementary material for: High activity and specificity of bacteriophage cocktails against carbapenem-resistant Klebsiella pneumoniae belonging to the high-risk clones CG258 and ST307
Source: PubMed Central journal article supplement (PMC11663894; doi:10.3389/fmicb.2024.1502593), 2024-12-09
Supplement: Data_Sheet_3.pdf [file Data_Sheet_3.pdf]

## *Supplementary Material*

**Supplementary Table S3.** Antibiotic resistance of the bacterial isolates used for the evaluation of the intra-species host range of bacteriophages active against *K. pneumoniae*.

| Bacteria | Clonal Group or Clonal complex | Sequence Type | Carbapenemase | Amikacin | Gentamicin | Nalidixic acid | Ciprofloxacin | Nitrofurantoin | Tigecycline | TMP/SMX |
|----------|--------------------------------|---------------|---------------|----------|------------|----------------|---------------|----------------|-------------|---------|
| KL045    | 258                            | 512           | KPC-3         | 64 (R)   | 8 (R)      | ND             | 4 (R)         | ND             | 4 (R)       | ND      |
| KL004    | 258                            | 512           | KPC-3         | 64 (R)   | 4 (S)      | 32 (R)         | 4 (R)         | 512 (R)        | ND          | 320 (R) |
| KL015    | 258                            | 512           | KPC-3         | 64 (R)   | 4 (S)      | 32 (R)         | 4 (R)         | ND             | 2 (R)       | ND      |
| KP058    | 258                            | 512           | KPC-3         | 64 (R)   | 4 (S)      | ND             | 4 (R)         | ND             | 2 (R)       | ND      |
| KL009    | 258                            | 512           | KPC-2         | 16 (S)   | 1 (S)      | 32 (R)         | 4 (R)         | ND             | 2 (R)       | ND      |
| KH001    | 258                            | 258           | KPC-3         | 64 (R)   | 1 (S)      | 32 (R)         | 4 (R)         | 512 (R)        | ND          | 20 (R)  |
| KH004    | 258                            | 258           | KPC-3         | 16 (S)   | 16 (R)     | 32 (R)         | 4 (R)         | ND             | 2 (R)       | ND      |
| KH005    | 258                            | 258           | KPC-3         | 16 (S)   | 16 (R)     | 32 (R)         | 4 (R)         | ND             | 4 (R)       | ND      |
| KH013    | 258                            | 258           | KPC-3         | 64 (R)   | 4 (S)      | ND             | 4 (R)         | ND             | 2 (R)       | ND      |
| KH028    | 258                            | 258           | KPC-3         | 64 (R)   | 4 (S)      | ND             | 4 (R)         | ND             | 2 (R)       | ND      |
| KH036    | 258                            | 258           | KPC-3         | 64 (R)   | 16 (R)     | ND             | 4 (R)         | ND             | 2 (R)       | ND      |
| KL008    | 258                            | 258           | KPC-3         | 64 (R)   | 4 (S)      | 32 (R)         | 4 (R)         | ND             | 2 (R)       | ND      |
| KL055    | 258                            | 258           | KPC-3         | 4 (S)    | 16 (R)     | ND             | 4 (R)         | ND             | 0.5 (S)     | ND      |
| KL011    | 258                            | 258           | KPC-3         | 64 (R)   | 4 (S)      | 32 (R)         | 4 (R)         | ND             | 2 (R)       | ND      |
| KL013    | 258                            | 258           | KPC-3         | 64 (R)   | 4 (S)      | 32 (R)         | 4 (R)         | ND             | 2 (R)       | ND      |
| RK015    | 258                            | 258           | KPC-3         | 64 (R)   | 4 (S)      | ND             | 4 (R)         | ND             | 2 (R)       | ND      |
| KL054    | 258                            | 258           | KPC-2         | 16 (S)   | 16 (R)     | ND             | 4 (R)         | ND             | 8 (R)       | ND      |
| KL056    | 258                            | 258           | KPC-2         | 64 (R)   | 8 (R)      | ND             | 4 (R)         | ND             | 4 (R)       | ND      |

## Supplementary Material

|       |     |     |       |        |        |        |          |         |         |         |
|-------|-----|-----|-------|--------|--------|--------|----------|---------|---------|---------|
| KP027 | 258 | 258 | KPC-2 | 16 (S) | 16 (R) | 32 (R) | 2 (R)    | ND      | 4 (R)   | ND      |
| KP029 | 258 | 258 | KPC-2 | 16 (S) | 16 (R) | 32 (R) | 1 (S)    | 64 (R)  | ND      | 320 (R) |
| KP042 | 258 | 258 | KPC-2 | 4 (S)  | 1 (S)  | ND     | 0.25 (S) | ND      | 0.5 (S) | ND      |
| KR006 | 258 | 258 | KPC-2 | 64 (R) | 8 (R)  | ND     | 4 (R)    | ND      | ND      | ND      |
| KR015 | 258 | 258 | KPC-2 | 4 (S)  | 16 (R) | ND     | 4 (R)    | 512 (R) | ND      | 320 (R) |
| RK052 | 258 | 258 | KPC-2 | 64 (R) | 4 (S)  | ND     | 4 (R)    | ND      | ND      | ND      |
| KP031 | 258 | 11  | KPC-2 | 2 (S)  | 16 (R) | ND     | 4 (R)    | ND      | 2 (R)   | ND      |
| KL024 | 258 | 258 | KPC-3 | 2 (S)  | 1 (S)  | ND     | 4 (R)    | ND      | 4 (R)   | ND      |
| KH018 | 307 | 307 | KPC-2 | 8 (S)  | 16 (R) | ND     | 4 (R)    | 64 (R)  | ND      | 40 (R)  |
| KH021 | 307 | 307 | KPC-2 | 8 (S)  | 16 (R) | ND     | 4 (R)    | ND      | 0.5 (S) | ND      |
| KH033 | 307 | 307 | KPC-2 | 2 (S)  | 16 (R) | ND     | 4 (R)    | ND      | 8 (R)   | ND      |
| KH041 | 307 | 307 | KPC-2 | 2 (S)  | 16 (R) | ND     | 4 (R)    | ND      | 2 (R)   | ND      |
| KH042 | 307 | 307 | KPC-2 | 16 (S) | 16 (R) | ND     | 4 (R)    | ND      | 4 (R)   | ND      |
| KH043 | 307 | 307 | KPC-2 | 2 (S)  | 16 (R) | ND     | 4 (R)    | ND      | 4 (R)   | ND      |
| KL049 | 307 | 307 | KPC-2 | 2 (S)  | 16 (R) | ND     | 4 (R)    | ND      | 1 (S)   | ND      |
| KH016 | 307 | 307 | KPC-3 | 8 (S)  | 16 (R) | ND     | 4 (R)    | ND      | 2 (R)   | ND      |
| KH020 | 307 | 307 | KPC-3 | 2 (S)  | 16 (R) | ND     | 4 (R)    | ND      | ND      | ND      |
| KH023 | 307 | 307 | KPC-3 | 2 (S)  | 16 (R) | ND     | 4 (R)    | ND      | 1 (S)   | ND      |
| KH035 | 307 | 307 | KPC-3 | 2 (S)  | 16 (R) | ND     | 4 (R)    | ND      | 2 (R)   | ND      |
| KH037 | 307 | 307 | KPC-3 | 2 (S)  | 16 (R) | ND     | 4 (R)    | ND      | 2 (R)   | ND      |
| KL057 | 307 | 307 | KPC-3 | 64 (R) | 16 (R) | ND     | 4 (R)    | ND      | 1 (S)   | ND      |
| KH022 | 307 | 307 | KPC-2 | 2 (S)  | 16 (R) | ND     | 0.25 (S) | ND      | 0.5 (S) | ND      |
| KH045 | 307 | 307 | KPC-2 | 2 (S)  | 1 (S)  | ND     | 4 (R)    | ND      | ND      | ND      |
| KL044 | 307 | 307 | KPC-2 | 4 (S)  | 16 (R) | ND     | 4 (R)    | ND      | 2 (R)   | ND      |
| KC001 | ND  | 14  | KPC-2 | 16 (S) | 16 (R) | 32 (R) | 2 (R)    | ND      | ND      | ND      |
| KH002 | ND  | 14  | KPC-2 | 2 (S)  | 1 (S)  | 32 (R) | 4 (R)    | ND      | 4 (R)   | ND      |
| KP010 | ND  | 14  | KPC-2 | 64 (R) | ND     | 32 (R) | 2 (R)    | ND      | 2 (R)   | ND      |
| KP024 | 14  | 14  | KPC-2 | 16 (S) | 16 (R) | 32 (R) | 1 (S)    | ND      | 4 (R)   | ND      |
| KP030 | ND  | 14  | KPC-2 | 16 (S) | 16 (R) | 32 (R) | 2 (R)    | 128 (R) | ND      | 320 (R) |
| KP036 | ND  | 14  | KPC-2 | 16 (S) | 16 (R) | ND     | 4 (R)    | ND      | 8 (R)   | ND      |
| KP043 | ND  | 14  | KPC-2 | 16 (S) | 16 (R) | ND     | 2 (R)    | ND      | 4 (R)   | ND      |

|       |    |      |                    |        |        |        |          |         |         |         |
|-------|----|------|--------------------|--------|--------|--------|----------|---------|---------|---------|
| KP050 | ND | 14   | KPC-2              | 16 (S) | 16 (R) | ND     | 1 (S)    | ND      | 4 (R)   | ND      |
| KR007 | ND | 14   | KPC-2              | 16 (S) | 16 (R) | ND     | 1 (S)    | 128 (R) | ND      | 320 (R) |
| KH010 | ND | 14   | KPC-3              | 2 (S)  | 1 (S)  | 16 (S) | 1 (S)    | ND      | 1 (S)   | ND      |
| KH011 | ND | 17   | KPC-2              | 2 (S)  | 1 (S)  | 4 (S)  | 0.25 (S) | ND      | 0.5 (S) | ND      |
| KH038 | ND | 23   | KPC-2              | 2 (S)  | 1 (S)  | ND     | 0.25 (S) | ND      | 0.5 (S) | ND      |
| KP034 | ND | 40   | KPC-3              | 16 (S) | 1 (S)  | ND     | 4 (R)    | ND      | 2 (R)   | ND      |
| KH003 | ND | 45   | KPC-3              | 2 (S)  | 1 (S)  | 32 (R) | 2 (R)    | 512 (R) | ND      | 20 (R)  |
| KH008 | ND | 129  | KPC-2              | 4 (S)  | 1 (S)  | 32 (R) | 1 (S)    | ND      | 8 (R)   | ND      |
| KC008 | ND | 140  | KPC-2              | 2 (S)  | 1 (S)  | ND     | 0.25 (S) | ND      | 1 (S)   | ND      |
| KH014 | ND | 151  | KPC-3              | 16 (S) | 16 (R) | ND     | 2 (R)    | ND      | 2 (R)   | ND      |
| KL037 | ND | 231  | KPC-3              | 64 (R) | 4 (S)  | ND     | 4 (R)    | ND      | 4 (R)   | ND      |
| KL036 | ND | 259  | KPC-2              | 2 (S)  | 16 (R) | ND     | 0.5 (S)  | ND      | 1 (S)   | ND      |
| KH007 | ND | 268  | KPC-3              | 2 (S)  | 16 (R) | 16 (S) | 1 (S)    | ND      | 2 (R)   | ND      |
| KH015 | ND | 444  | KPC-3              | 2 (S)  | 1 (S)  | ND     | 0.25 (S) | ND      | ND      | ND      |
| KP020 | ND | 526  | KPC-2              | 2 (S)  | 1 (S)  | 8 (S)  | 1 (S)    | ND      | 1 (S)   | ND      |
| KC006 | ND | 560  | KPC-2              | 2 (S)  | 16 (R) | ND     | 4 (R)    | ND      | ND      | ND      |
| KH027 | ND | 971  | KPC-3              | 2 (S)  | 1 (S)  | ND     | 2 (R)    | ND      | 1 (S)   | ND      |
| KR021 | ND | 1198 | KPC-2              | 2 (S)  | 1 (S)  | ND     | 0.25 (S) | ND      | 1 (S)   | ND      |
| KC002 | ND | 1377 | KPC-2              | 2 (S)  | 16 (R) | 32 (R) | 4 (R)    | 256 (R) | ND      | 20 (R)  |
| KP057 | ND | 1533 | KPC-2              | 64 (R) | 16 (R) | ND     | 0.25 (S) | ND      | 0.5 (S) | ND      |
| KH006 | ND | 1661 | KPC-3              | 2 (S)  | 16 (R) | ND     | 4 (R)    | ND      | ND      | ND      |
| KL048 | ND | 1703 | KPC-2              | 2 (S)  | 1 (S)  | ND     | 0.25 (S) | ND      | 1 (S)   | ND      |
| KP019 | ND | 1704 | KPC-2              | 16 (S) | 16 (R) | 32 (R) | 1 (S)    | 64 (R)  | ND      | 320 (R) |
| KC003 | ND | 1705 | KPC-2              | 2 (S)  | 1 (S)  | 32 (R) | 4 (R)    | ND      | 2 (R)   | ND      |
| KP025 | ND | 1706 | KPC-2              | 16 (S) | 1 (S)  | 32 (R) | 4 (R)    | ND      | 4 (R)   | ND      |
| KC004 | ND | 1707 | KPC-2              | 2 (S)  | 16 (R) | 16 (S) | 1 (S)    | ND      | 1 (S)   | ND      |
| KP007 | ND | 1708 | KPC-2              | 8 (S)  | 1 (S)  | 32 (R) | 4 (R)    | ND      | ND      | ND      |
| KP056 | ND | 1887 | KPC-2              | 64 (R) | 16 (R) | ND     | 0.25 (S) | ND      | 0.5 (S) | ND      |
|       |    |      | <b>n</b>           | 77     | 76     | 28     | 77       | 10      | 58      | 10      |
|       |    |      | <b>Susceptible</b> | 57     | 32     | 5      | 21       | 0       | 19      | 0       |
|       |    |      | <b>Resistant</b>   | 20     | 44     | 23     | 56       | 10      | 39      | 10      |

ND, No data. All bacterial isolates are part of the strain collection of the Grupo de Investigación en Microbiología Básica y Aplicada (MICROBA) and were collected in the city of Medellin, Colombia. Identification and susceptibility tests were performed using the semi-automated method VITEK® 2, genes that encoded carbapenemases were identified by PCR and sequenced to determine gene-variants. Molecular typing was performed using Multilocus sequence typing (MLST). Isolates whose susceptibility interpretation was intermediate were considered resistant. The interpretation of the minimum inhibitory concentrations (MIC) was done according to CLSI M100 Performance Standards for Antimicrobial Susceptibility Testing S25 and EUCAST clinical breakpoints v 4.0.
